# Supplementary material for: The regulatory effects of fucoidan and laminarin on functional dyspepsia mice induced by loperamide
Source: Royal Society of Chemistry journal article supplement (doi:10.1039/d3fo00936j), 2023-01-01
Supplement: d3fo00936j1.pdf [file d3fo00936j1.pdf]

**TableS 1.** The monosaccharides components of FUC and LA. The chromatographic column: ZORBAX EclipseXDB-C18; Acetonitrile was used as the mobile phase (30°C/250 nm/10μL).

| Name | Total contents of each component (μg/mg) |         |                             |          |                 |           | Proportion (%)      |         |           |
|------|------------------------------------------|---------|-----------------------------|----------|-----------------|-----------|---------------------|---------|-----------|
|      |                                          | Mannose | D-Glucosamine hydrochloride | Rhamnose | Glucuronic Acid | Galactose | D-Galactosamine HCl | Glucose | Galactose |
| FUC  | 594.807                                  | 5.021   | 0.002                       | 3.972    | 7.186           | 0         | 0                   | 2.720   | 7.324     |
| LA   | 4.731                                    | 0       | 0                           | 0        | 35.147          | 0         | 26.558              | 38.295  | 0         |

**Table S2.** The average weight of mice in the control check and model control groups were shown in this table. (Mean ± SD) The food intake of each mouse= 24-hour food intake per cage/ number of mice in the cage. There was no significant difference in body weight and food intake between the two groups before and after loperamide intervention.

|                     | Body weight(g)<br>(day 1) | Body weight(g)<br>(day 7) | Food intake(g)<br>(day 1) | Food intake(g)<br>(day 7) |
|---------------------|---------------------------|---------------------------|---------------------------|---------------------------|
| Control check group | 19.68 ± 0.25              | 21.74 ± 0.93              | 4.52                      | 4.00                      |
| Model control group | 19.76 ± 0.16              | 21.60 ± 0.80              | 4.17                      | 3.88                      |

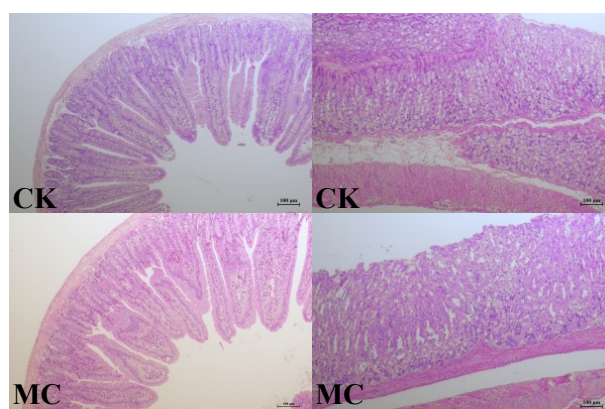

**FigS. 1** Representative H&E-stained duodenum (left) and stomach (right) sections were observed at 100 ×. After observation, the gastrointestinal structure of mice in MC group did not change significantly compared with that in CK group.

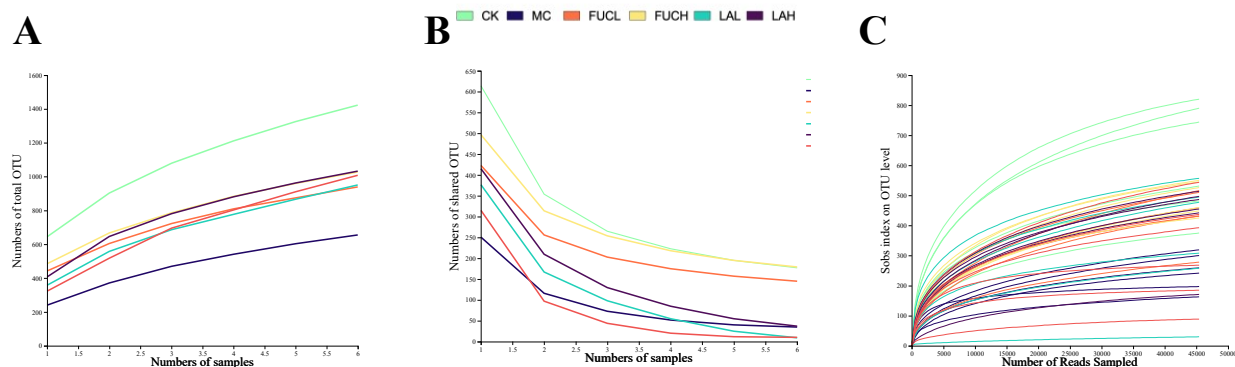

**FigS. 2** Pan (A) and Core (B) OUT analysis of all groups; rarefaction curve (Sobs) (C). According to the observation, it can be seen that the sequencing volume is sufficient.

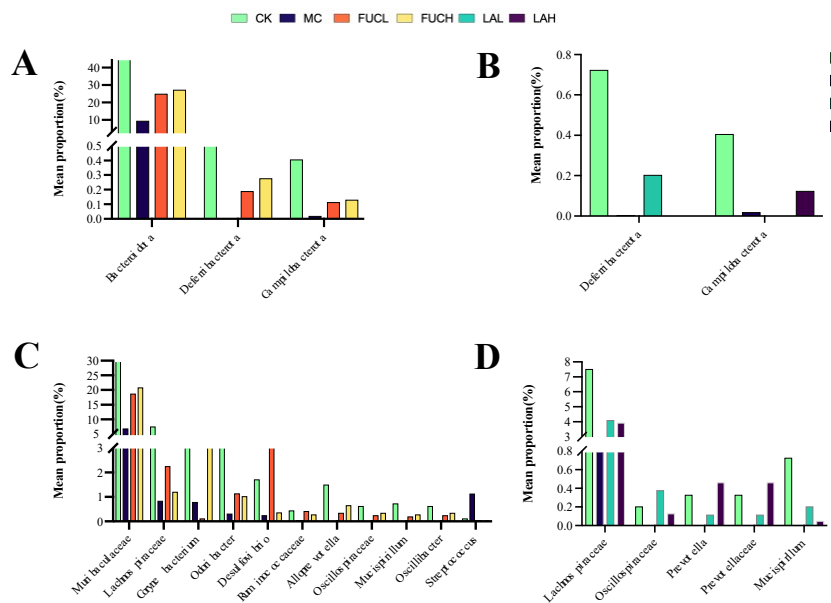

**FigS. 3** According to the results of multi-group comparison and two-group comparison at phylum (A, B) and genus levels (C, D), the species composition differences were shown above. At the phylum level, the intervention of FUC significantly increased the levels of *Bacteroidetes* and *Deferribacterota*, and the intervention of LA remarkably upregulated the level of *Deferribacterota*. At the genus level, FUC and LA intervention increased the levels of many probiotics and decreased the proportion of some harmful bacteria.
